# Supplementary material
Source: PubMed Central journal article supplement (PMC1637603)

Blood glucose mg/dl

500  
400  
300  
200  
100  
0

**C3**

**C10**

**Alloxan 3 days**

**Alloxan 10 days**

**STZ 3 days**

**STZ 10 days**

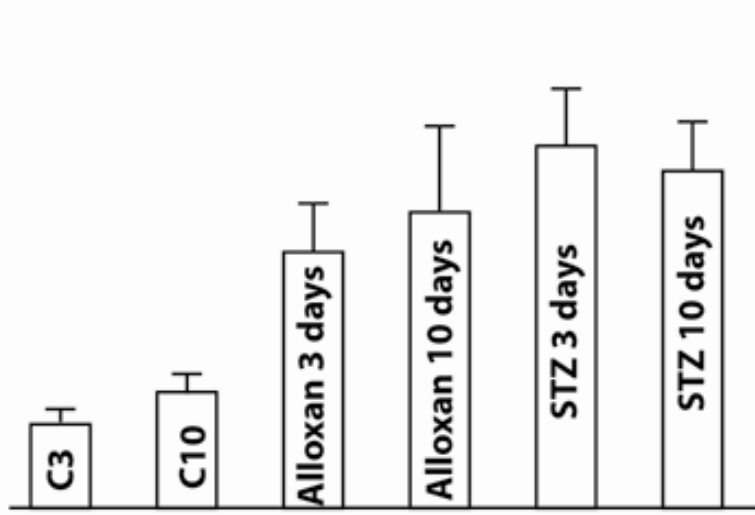

Supplement: pnas_0607626103_1.pdf [file pnas_0607626103_1.pdf]

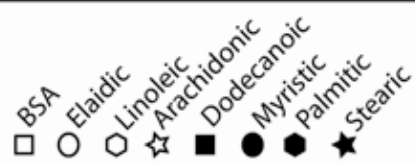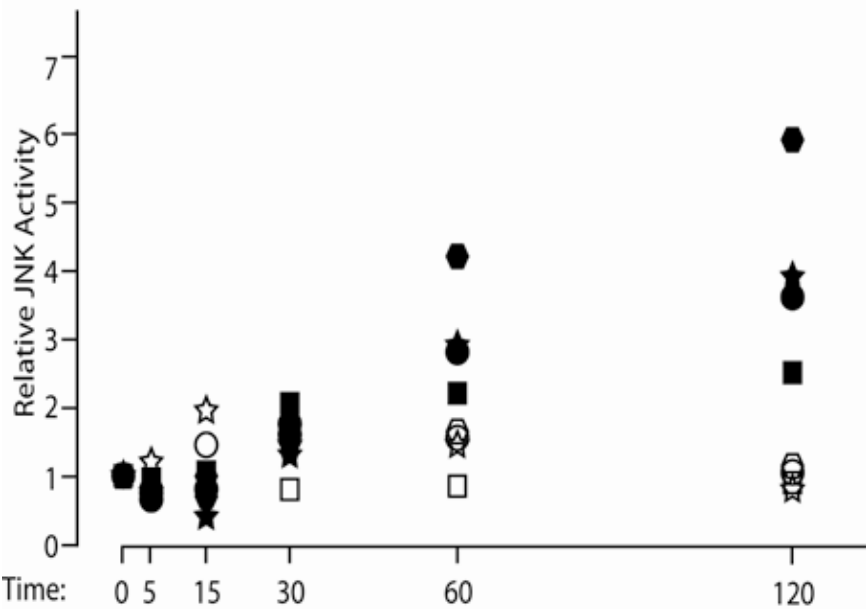

Supplement: pnas_0607626103_2.pdf [file pnas_0607626103_2.pdf]

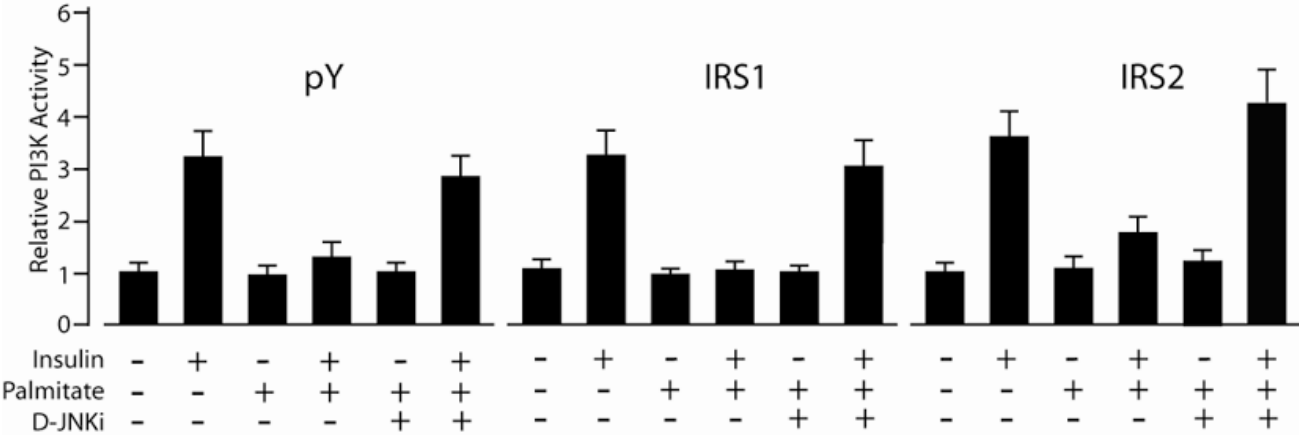

Supplement: pnas_0607626103_3.pdf [file pnas_0607626103_3.pdf]

GSTcJUN →

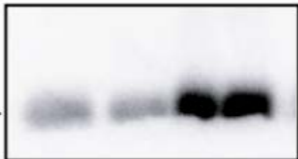

JNK1 →

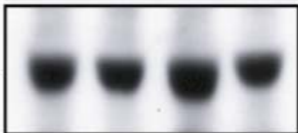

|                 |   |   |   |   |
|-----------------|---|---|---|---|
| Glucose 5.5 mM  | + | - | + | - |
| Glucose 16.7 mM | - | + | - | + |
| Palmitate       | - | - | + | + |
| BSA             | + | + | - | - |

Supplement: pnas_0607626103_5.pdf [file pnas_0607626103_5.pdf]

IRS1 p-Ser307 →

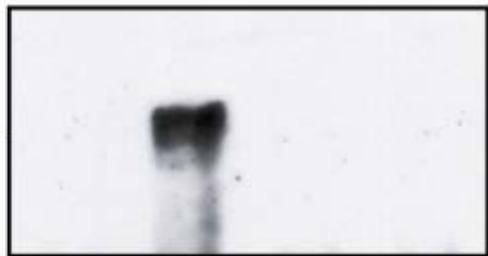

IRS1 →

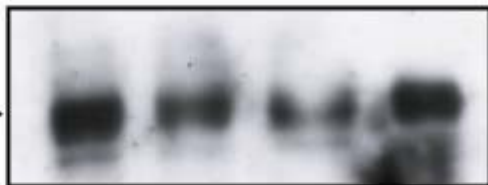

|           |   |   |   |   |
|-----------|---|---|---|---|
| Palmitate | - | + | - | + |
| BSA       | + | - | + | - |
| D-JNKi    | - | - | + | + |

Supplement: pnas_0607626103_6.pdf [file pnas_0607626103_6.pdf]
